# Supplementary material for: Astaxanthin Prevents Atrophy in Slow Fiber Muscles by Inhibiting Mitochondrial Reactive Oxygen Species Via a Mitochondria-Mediated Apoptosis Pathway
Source: Preprints.org preprint supplement (doi:10.20944/preprints202006.0222.v1), 2020-06-17
Supplement: Supplementary file 3 [file supplementary]

**Supplementary Table 1** Composition of the experimental diets

|  | ND | AX |
| --- | --- | --- |
| α-corn starch (g) | 45.4 | 45.4 |
| Sucrose (g) | 22.8 | 22.8 |
| Casein (g) | 20.0 | 20.0 |
| Cystine (g) | 0.3 | 0.3 |
| Soybean oil (g) | 5.0 | 4.8 |
| Bio Astin SCE (g) | 0 | 0.2 |
| Vitamin mix (g) | 1.0 | 1.0 |
| Mineral mix including choline (g) | 3.5 | 3.5 |
| Cellulose (g) | 2.0 | 2.0 |
| Tertiary butylhydroquinone (g) | 0.0014 | 0.0014 |

Bio Astin SCE contains 10% astaxanthin derived from *Haematococcus pluvialis*. ND, normal diet; AX, astaxanthin-supplemented diet.
